# Supplementary material for: Two tetranuclear Mn-complexes as biomimetic models of the oxygen evolving complex in Photosystem II. A synthesis, characterisation and reactivity study
Source: Royal Society of Chemistry journal article supplement (doi:10.1039/b906175d), 2009-01-01
Supplement: b906175d.pdf [file b906175d.pdf]

**Two tetra-nuclear Mn-complexes as biomimetic models of the oxygen evolving complex in Photosystem II – A synthesis, characterisation and reactivity study**

Gustav Berggren,<sup>a</sup> Anders Thapper,<sup>a</sup> Ping Huang,<sup>a</sup> Philipp Kurz,<sup>b</sup> Lars Eriksson,<sup>c</sup>

Stenbjörn Styring,<sup>a</sup> Magnus F. Anderlund<sup>\*a</sup>

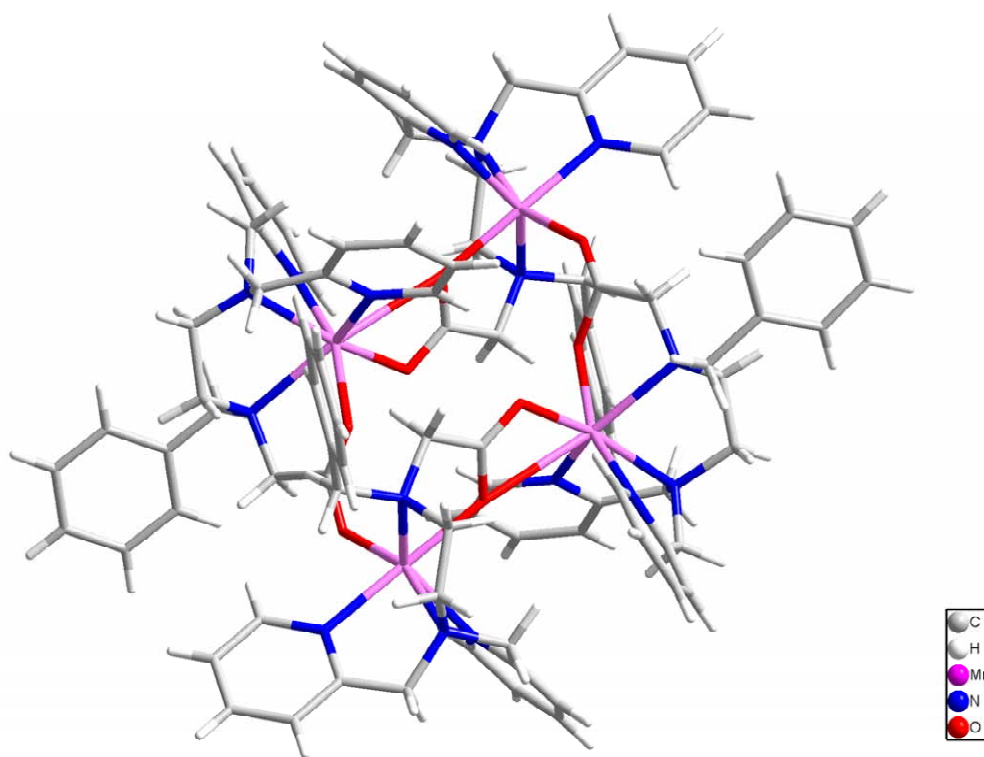

Fig. S1 Crystal structure of  $2(\text{ClO}_4)_4$

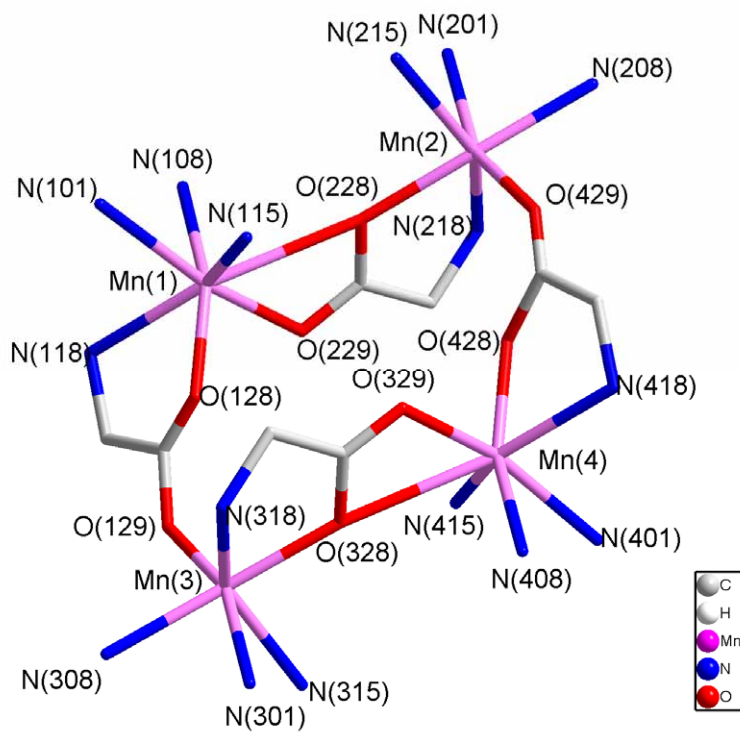

**Fig. S2** Crystal structure of  $2(\text{ClO}_4)_4$

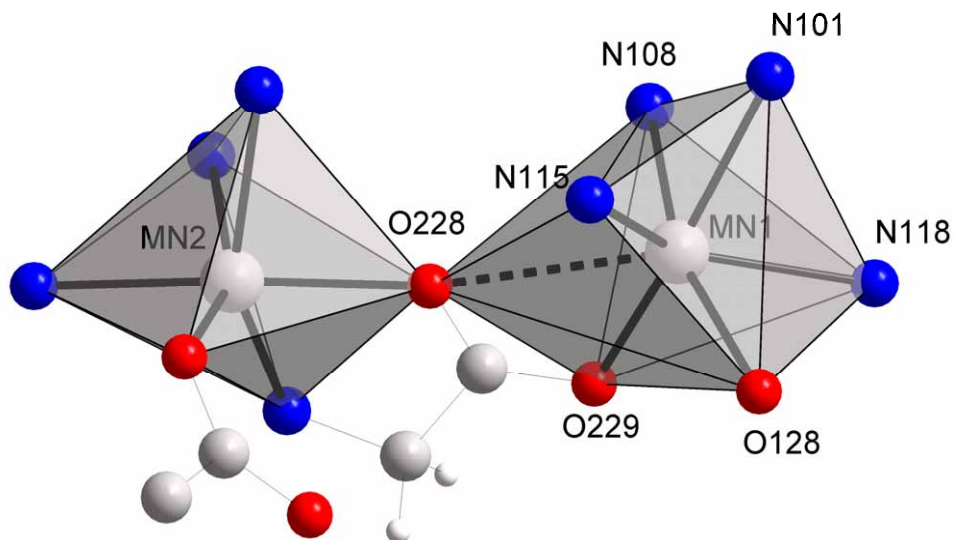

**Fig. S3** Geometry of first coordination sphere around Mn atoms in  $1(\text{ClO}_4)_4$

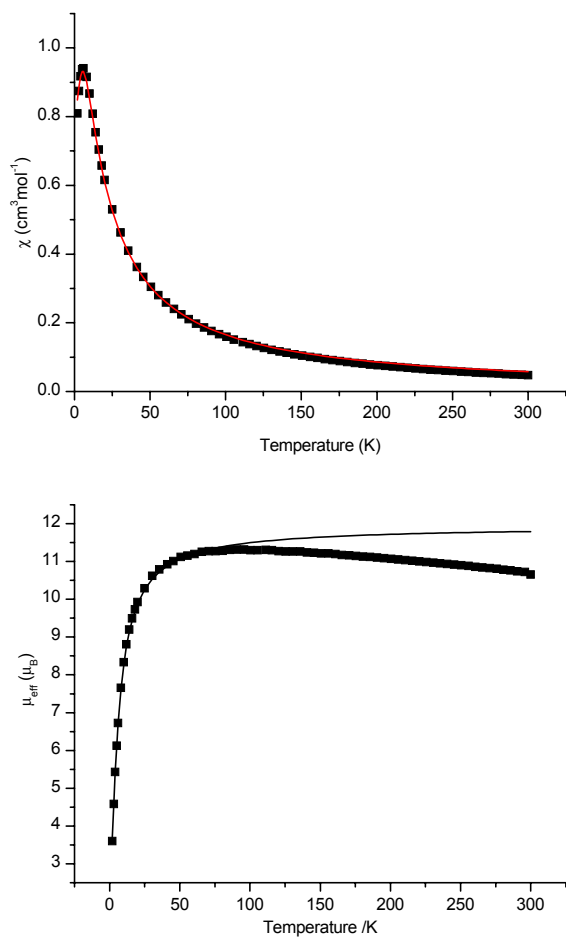

**Fig. S4 (top)** Temperature dependence of the molar susceptibility of  $2(\text{ClO}_4)_4$  in the solid state. The red line represents fitted curve using eq. 1 (see text). **(bottom)** The effective magnetic moment ( $\mu_{\text{eff}}$ ) of  $2(\text{ClO}_4)_4$  in solid state. The black line represents fitted curve using eq. 1 (see text).

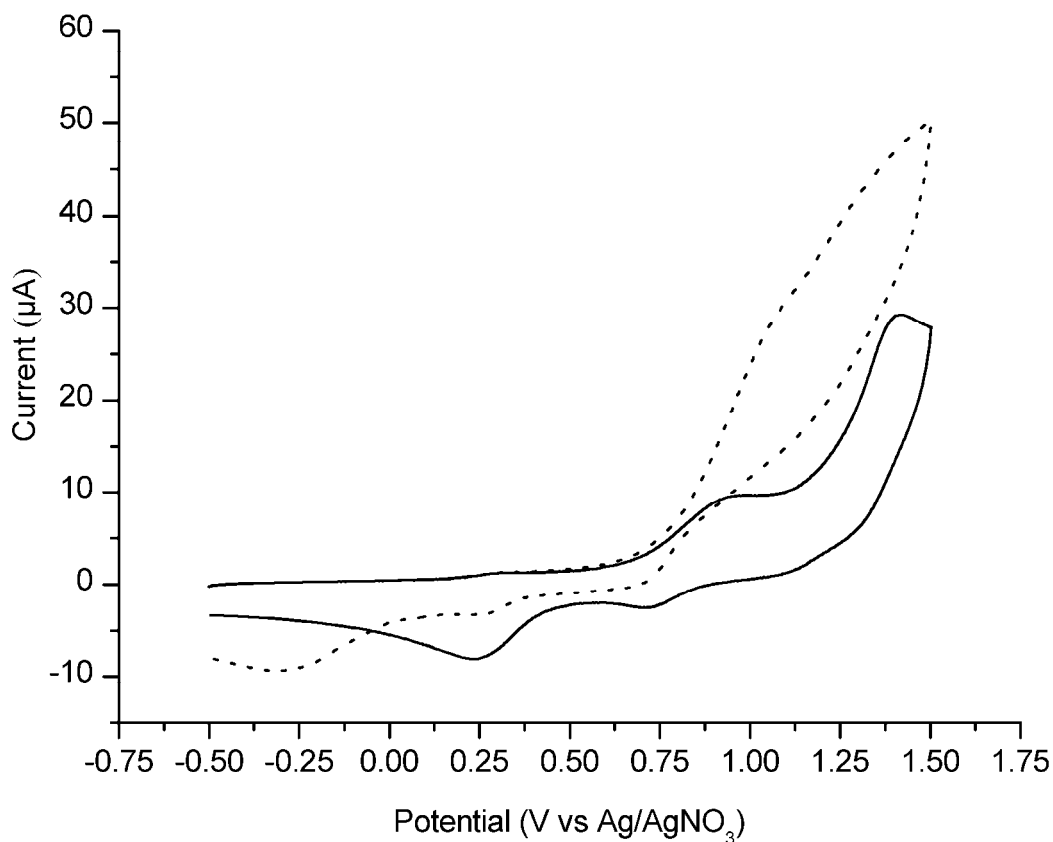

**Fig. S5** Cyclic voltammograms of  $2^{4+}$  [0.5 mM] in MeCN (solid line), in the presence of 6 mM lutidine (dotted line). Electrolyte 0.1 M TBAPF<sub>6</sub>, scan rate 0.1 V s<sup>-1</sup> at 20 °C.

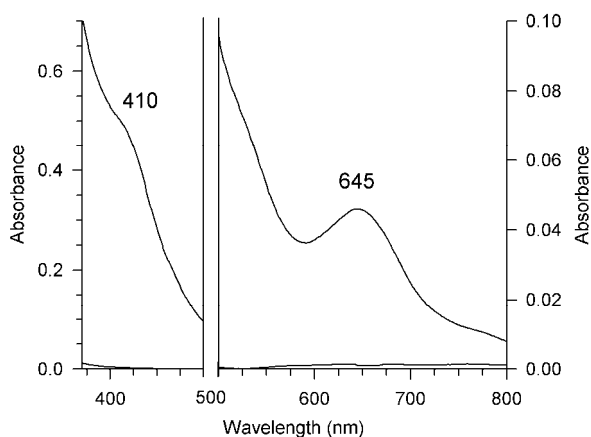

**Fig. S6** Absorption spectra of  $1^{4+}$  in MeCN + 2% H<sub>2</sub>O in a spectroelectrochemical cell (0.1 M TBAPF<sub>6</sub>). Spectra are collected at 0 V (bottom trace), and after exhaustive bulk electrolysis at 0.8 V (top trace).
